# Supplementary material for: Stabilization of beryllium-containing planar pentacoordinate carbon species through attaching hydrogen atoms
Source: Royal Society of Chemistry journal article supplement (doi:10.1039/c8ra07664b), 2018-01-01
Supplement: c8ra07664b1.pdf [file c8ra07664b1.pdf]

## Electronic Supplementary Information

### Stabilization of beryllium-containing planar pentacoordinate carbon species through attaching hydrogen atoms

Xue-Feng Zhao,<sup>a</sup> Jian-Hong Bian,<sup>a</sup> Fang Huang,<sup>c</sup> Caixia Yuan,<sup>a</sup> Qiang Wang,<sup>b\*</sup> Ping Liu,<sup>b</sup> Debao Li,<sup>b</sup> Xiaotai Wang<sup>d,a</sup> and Yan-Bo Wu<sup>a,b\*</sup>

- Key Laboratory of Materials for Energy Conversion and Storage of Shanxi Province, Institute of Molecular Science, Shanxi University, Taiyuan, 030006, China.
- State Key Laboratory of Coal Conversion, Institute of Coal Chemistry, Chinese Academy of Sciences, 27 South Taoyuan Road, Taiyuan, Shanxi, 030001, China.
- College of Chemistry, Chemical Engineering and Materials Science, Shandong Normal University, 88 East Culture Road, Jinan, Shandong, 250014, China.
- Department of Chemistry, University of Colorado Denver, Campus Box 194, P.O. Box 173364, Denver, Colorado 80217-3364, United States.

\*To whom correspondence should be address: [wzb@sxu.edu.cn](mailto:wzb@sxu.edu.cn) (Y.W.) and [wqiang@sxicc.ac.cn](mailto:wqiang@sxicc.ac.cn) (Q.W.)

### Contents

**Fig. S1.** Optimized structures  $\text{CAI}_5^+$ ,  $\text{CAI}_4\text{Be}$ ,  $\text{CAI}_3\text{Be}_2^-$ ,  $\text{CAI}_2\text{Be}_3^{2-}$ , and  $\text{CAIBe}_4^{3-}$  at the B3LYP/aug-cc-pVTZ level. Bond distances and NBO charges are given in black and italic blue fonts, respectively.

**Fig. S2.** AdNDP bonding patterns of **1a–3a** and **7a–9a** with occupation numbers (ONs).

**Fig. S3.** NICS of  $\text{CAI}_4\text{Be}$ ,  $\text{CAI}_3\text{Be}_2^-$ , **1a–3a**, and **7a–9a**. Points with negative NICS values (shown in red balls) are aromatic.

**Fig. S4.** B3LYP/aug-cc-pvtz-optimized structures for **1a–9a** and their isomers. The relative free energies (kcal/mol) were compared using CCSD(T)/aug-cc-pvtz electronic energies plus B2PLYP-D3/aug-cc-pvtz Gibbs free energy corrections.

**Coordinates.** The Cartesian coordinates of structures shown in Fig. 1 optimized at the B3LYP/aug-cc-pVTZ level and those shown in Fig. S4 optimized at the B3LYP/aug-cc-pVTZ level. The energies for structures shown in Fig. S4 were obtained using CCSD(T)/aug-cc-pVTZ electronic energies plus B2PLYP-D3/aug-cc-pVTZ Gibbs free energy corrections.

**Fig. S1.** Optimized structures  $\text{CaI}_4\text{Be}$ ,  $\text{CaI}_3\text{Be}_2^-$ ,  $\text{CaI}_2\text{Be}_3^{2-}$ , and  $\text{CaIBe}_4^{3-}$  at the B3LYP/aug-cc-pVTZ level. Bond distances and NBO charges are given in black and italic blue fonts, respectively.

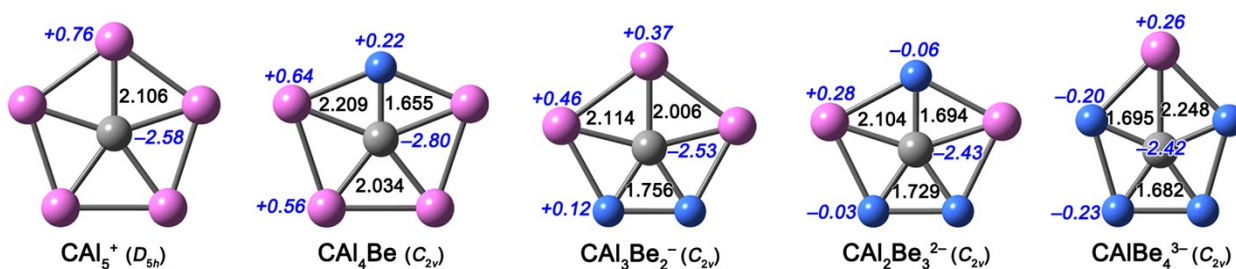

**Fig. S2.** AdNDP bonding patterns of **1a–3a** and **7a–9a** with occupation numbers (ONs).

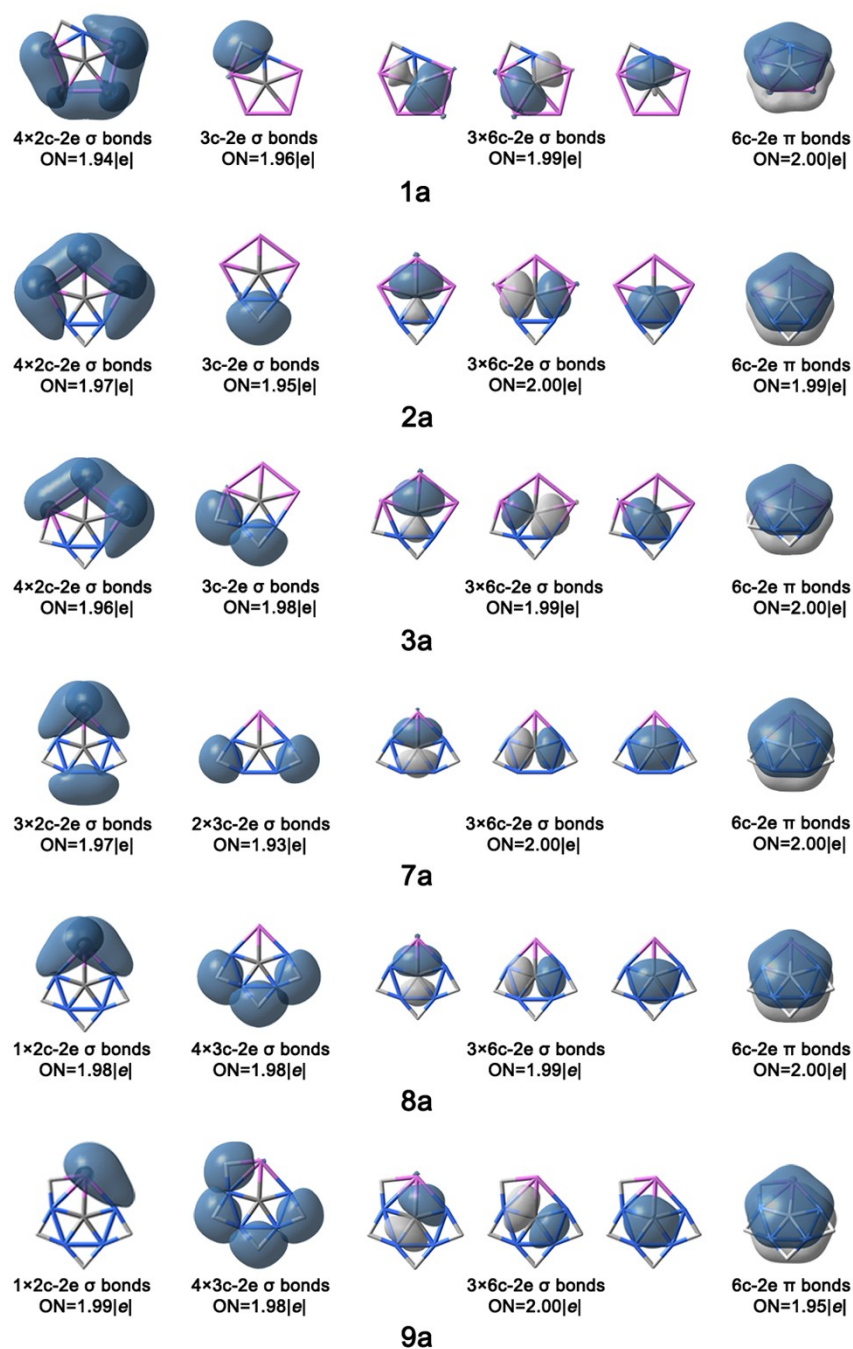

**Fig. S3.** NICS of  $\text{CaI}_4\text{Be}$ ,  $\text{CaI}_3\text{Be}_2^-$ , **1a–3a**, and **7a–9a**. Points with negative NICS values (shown in red balls) are aromatic.

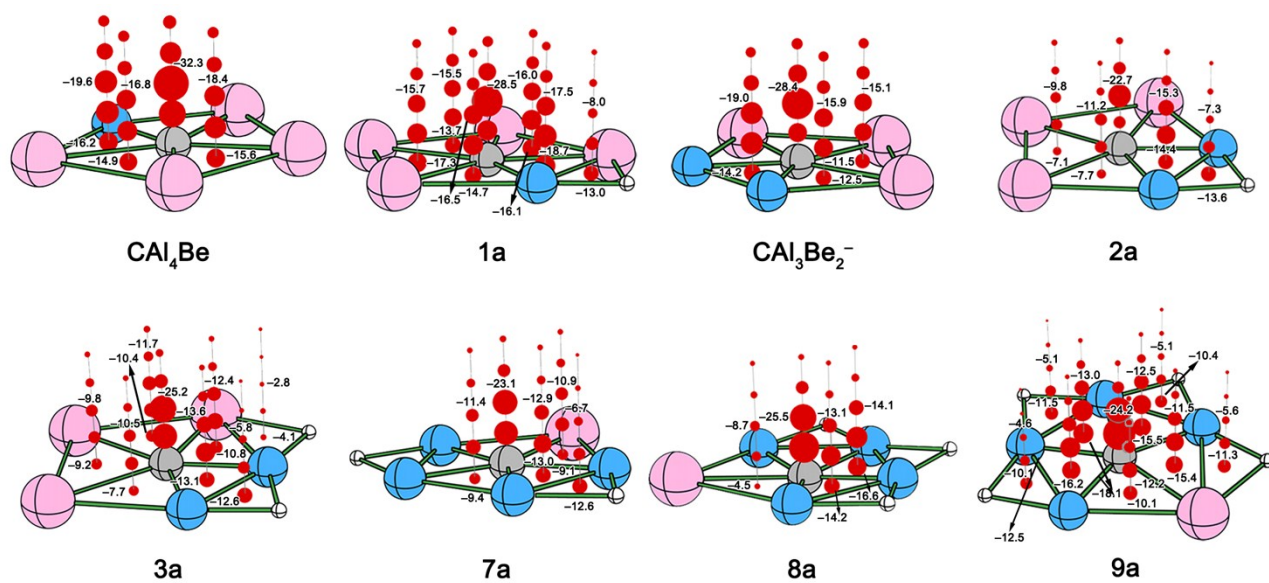

**Fig. S4.** B3LYP/aug-cc-pvtz-optimized structures for **1a–9a** and their isomers. The relative free energies (kcal/mol) were calculated using CCSD(T)/ aug-cc-pvtz electronic energies plus B2PLYP-D3/aug-cc-pvtz Gibbs free energy corrections.

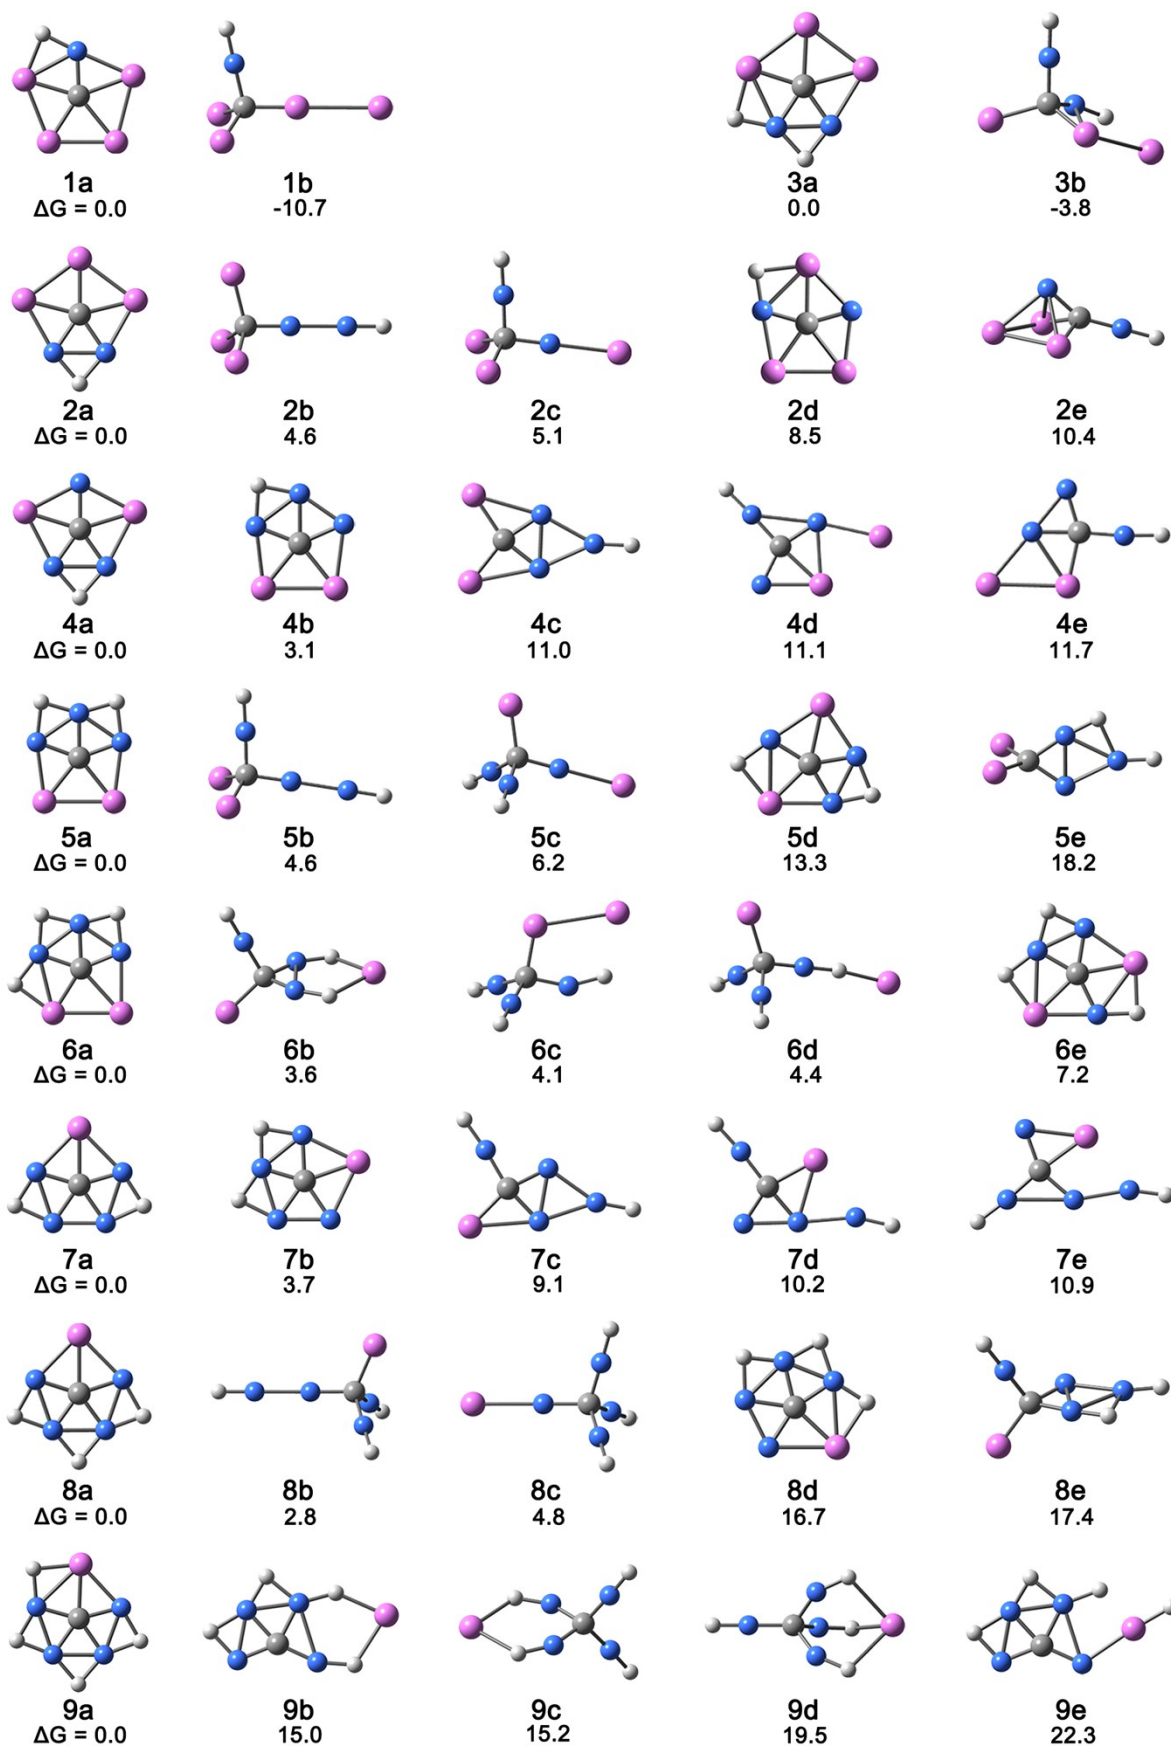

**Coordinates.** The Cartesian coordinates of structures shown in Fig. 1 optimized at the B3LYP/aug-cc-pVTZ level and those shown in Fig. S4 optimized at the B3LYP/aug-cc-pVTZ level. The energies for structures shown in Fig. S4 were obtained using CCSD(T)/aug-cc-pVTZ electronic energies plus B2PLYP-D3/aug-cc-pVTZ Gibbs free energy corrections.

### 1a

Free energy = -1021.066317 a.u.

|    |             |             |            |
|----|-------------|-------------|------------|
| Al | 1.87238525  | 1.22975310  | 0.00000000 |
| Al | 1.49143450  | -1.28104745 | 0.00000000 |
| Al | -0.99351044 | -1.53265379 | 0.00000000 |
| Al | -2.12956619 | 0.67341815  | 0.00000000 |
| Be | -0.28496333 | 1.92875431  | 0.00000000 |
| C  | -0.06148973 | 0.28128860  | 0.00000000 |
| H  | -1.62086891 | 2.43414102  | 0.00000000 |

### 1b

Free energy = -1021.083382 a.u.

|    |             |             |             |
|----|-------------|-------------|-------------|
| Be | 1.91309368  | -1.25199636 | 0.00000000  |
| C  | 0.26879006  | -1.00189168 | 0.00000000  |
| H  | 3.21924002  | -1.44389613 | 0.00000000  |
| Al | -0.45377568 | -1.92513524 | 1.72942900  |
| Al | 0.10567503  | 0.88476095  | 0.00000000  |
| Al | -0.45377568 | -1.92513524 | -1.72942900 |
| Al | -0.15845868 | 3.92421966  | 0.00000000  |

### 2a

Free energy = -793.9898113 a.u.

|    |            |             |             |
|----|------------|-------------|-------------|
| C  | 0.00000000 | 0.00000000  | -0.48015985 |
| Al | 0.00000000 | 2.03696600  | 0.03274715  |
| Be | 0.00000000 | 0.95319500  | -1.89056185 |
| Be | 0.00000000 | -0.95319500 | -1.89056185 |
| H  | 0.00000000 | 0.00000000  | -3.02079085 |
| Al | 0.00000000 | -2.03696600 | 0.03274715  |
| Al | 0.00000000 | 0.00000000  | 1.55190915  |

### 2b

Free energy = -793.9825208 a.u.

|    |             |             |             |
|----|-------------|-------------|-------------|
| Be | 0.00000000  | 0.00000000  | 1.54944677  |
| Be | 0.00000000  | 0.00000000  | 3.62711677  |
| C  | -0.00000000 | 0.00000000  | -0.09673823 |
| H  | 0.00000000  | 0.00000000  | 4.96276177  |
| Al | 0.00000000  | 1.92999989  | -0.64329709 |
| Al | 1.67142893  | -0.96499994 | -0.64329709 |

|    |             |             |             |
|----|-------------|-------------|-------------|
| Al | -1.67142893 | -0.96499994 | -0.64329709 |
|----|-------------|-------------|-------------|

2c

Free energy = -793.9816207 a.u.

|    |             |             |             |
|----|-------------|-------------|-------------|
| Be | -1.91915445 | 0.86894054  | 0.00000000  |
| Be | -0.12347921 | -0.89085824 | 0.00000000  |
| C  | -0.28654550 | 0.74792783  | 0.00000000  |
| H  | -3.24267339 | 0.99235411  | 0.00000000  |
| Al | 0.43600357  | 1.48249244  | -1.70407908 |
| Al | 0.13818371  | -3.37977336 | 0.00000000  |
| Al | 0.43600357  | 1.48249244  | 1.70407908  |

2d

Free energy = -793.976209 a.u.

|    |             |             |            |
|----|-------------|-------------|------------|
| Be | -0.56910784 | -1.64898580 | 0.00000000 |
| Be | -0.81340283 | 1.54864721  | 0.00000000 |
| C  | -0.22334783 | -0.01261080 | 0.00000000 |
| H  | -2.24314983 | 1.64243521  | 0.00000000 |
| Al | 1.60101616  | -1.21429480 | 0.00000000 |
| Al | -2.30356283 | -0.20137579 | 0.00000000 |
| Al | 1.40356817  | 1.32602320  | 0.00000000 |

2e

Free energy = -793.9732032 a.u.

|    |             |             |             |
|----|-------------|-------------|-------------|
| Be | -1.49263384 | 0.00429805  | 0.00000000  |
| Be | 0.12195300  | 2.72788279  | 0.00000000  |
| C  | -0.35393678 | 1.17791156  | 0.00000000  |
| H  | 0.52159444  | 3.99629770  | 0.00000000  |
| Al | 0.23890136  | 0.13200350  | 1.64471693  |
| Al | 0.23890136  | 0.13200350  | -1.64471693 |
| Al | 0.06717801  | -1.95573704 | 0.00000000  |

3a

Free energy = -794.3609493 a.u.

|    |             |             |            |
|----|-------------|-------------|------------|
| C  | -0.10445760 | 0.50437565  | 0.00000000 |
| Al | -1.90773588 | -0.34023382 | 0.00000000 |
| Be | -1.21810934 | 1.79518028  | 0.00000000 |
| Be | 0.66149198  | 1.98016216  | 0.00000000 |
| H  | -0.36669329 | 3.01010061  | 0.00000000 |
| Al | 2.09162999  | 0.19712838  | 0.00000000 |
| Al | 0.26323240  | -1.58512523 | 0.00000000 |
| H  | -2.59273624 | 1.32927439  | 0.00000000 |

### 3b

Free energy = -794.3670515 a.u.

|    |             |             |             |
|----|-------------|-------------|-------------|
| Be | 1.39649400  | 1.57324500  | 1.12758300  |
| Be | -0.14913600 | -0.51220100 | 1.24886300  |
| C  | 0.90698800  | 0.24120100  | 0.27290200  |
| H  | 1.77038000  | 2.64074400  | 1.80460800  |
| H  | -1.36390200 | -1.01209100 | 1.61783300  |
| Al | 2.62357900  | -0.84119600 | -0.21596100 |
| Al | -3.03150700 | -0.40643300 | 0.16730500  |
| Al | -0.42575200 | 0.68455000  | -1.07177800 |

### 4a

Free energy = -566.7256483 a.u.

|    |            |             |             |
|----|------------|-------------|-------------|
| C  | 0.00000000 | 0.00000000  | 0.20592091  |
| Al | 0.00000000 | 2.01017500  | -0.41336009 |
| Be | 0.00000000 | 0.00000000  | -1.46876009 |
| Be | 0.00000000 | 0.96987000  | 1.58384591  |
| Be | 0.00000000 | -0.96987000 | 1.58384591  |
| H  | 0.00000000 | 0.00000000  | 2.71610991  |
| Al | 0.00000000 | -2.01017500 | -0.41336009 |

### 4b

Free energy= -566.7207172 a.u.

|    |             |             |            |
|----|-------------|-------------|------------|
| Be | 2.02082686  | 0.48467141  | 0.00000000 |
| Be | -0.86875921 | 1.74952891  | 0.00000000 |
| Be | 1.05270763  | 2.13691274  | 0.00000000 |
| C  | 0.29182560  | 0.52866984  | 0.00000000 |
| H  | -0.16278967 | 3.02667531  | 0.00000000 |
| Al | 0.77170136  | -1.46055433 | 0.00000000 |
| Al | -1.57226021 | -0.36122618 | 0.00000000 |

### 4c

Free energy= -566.7081363 a.u.

|    |             |             |             |
|----|-------------|-------------|-------------|
| Be | 0.00000000  | 0.00000000  | 3.31349431  |
| Be | 0.00000000  | 0.97651200  | 1.37111031  |
| Be | 0.00000000  | -0.97651200 | 1.37111031  |
| C  | 0.00000000  | 0.00000000  | 0.03807031  |
| H  | 0.00000000  | 0.00000000  | 4.66886631  |
| Al | 0.00000000  | -1.56630800 | -1.12000569 |
| Al | -0.00000000 | 1.56630800  | -1.12000569 |

#### 4d

Free energy= -566.7078896 a.u.

|    |             |             |            |
|----|-------------|-------------|------------|
| Be | -2.48913992 | 1.45137242  | 0.00000000 |
| Be | -2.18682033 | -1.20325189 | 0.00000000 |
| Be | -0.05080056 | 1.10947492  | 0.00000000 |
| C  | -1.44879344 | 0.23025770  | 0.00000000 |
| H  | -3.42564670 | 2.41758898  | 0.00000000 |
| Al | 0.06835784  | -1.22504614 | 0.00000000 |
| Al | 2.31821528  | 0.51508330  | 0.00000000 |

#### 4e

Free energy= -566.7070337 a.u.

|    |             |             |            |
|----|-------------|-------------|------------|
| Be | 2.72992796  | 0.44944532  | 0.00000000 |
| Be | -0.13825039 | -1.18537043 | 0.00000000 |
| Be | 1.66959630  | -2.00971579 | 0.00000000 |
| C  | 1.37809776  | -0.41992296 | 0.00000000 |
| H  | 3.93830072  | 1.04296248  | 0.00000000 |
| Al | -2.37897404 | -0.17232405 | 0.00000000 |
| Al | 0.12882151  | 1.13071935  | 0.00000000 |

#### 5a

Free energy= -567.2843333 a.u.

|    |            |             |             |
|----|------------|-------------|-------------|
| C  | 0.00000000 | 0.00000000  | 0.58504317  |
| Al | 0.00000000 | 1.28956500  | -1.04832483 |
| Be | 0.00000000 | 1.57695600  | 1.17139417  |
| Be | 0.00000000 | -1.57695600 | 1.17139417  |
| Be | 0.00000000 | 0.00000000  | 2.25898417  |
| H  | 0.00000000 | 1.40145900  | 2.66954817  |
| H  | 0.00000000 | -1.40145900 | 2.66954817  |
| Al | 0.00000000 | -1.28956500 | -1.04832483 |

#### 5b

Free energy= -567.2770239 a.u.

|    |             |             |             |
|----|-------------|-------------|-------------|
| Be | 3.55207943  | -0.33289053 | 0.00000000  |
| Be | 1.50408904  | 0.01225214  | 0.00000000  |
| Be | -0.16830836 | 1.90532327  | 0.00000000  |
| C  | -0.11701128 | 0.26923325  | 0.00000000  |
| H  | -0.23883490 | 3.23187604  | 0.00000000  |
| H  | 4.86863252  | -0.55473331 | 0.00000000  |
| Al | -0.90304501 | -0.40889545 | 1.70203900  |
| Al | -0.90304501 | -0.40889545 | -1.70203900 |



### 5c

Free energy= -567.2745174 a.u.

|    |             |             |             |
|----|-------------|-------------|-------------|
| Be | -1.15389441 | 1.40452798  | 1.30065200  |
| Be | -1.15389441 | 1.40452798  | -1.30065200 |
| Be | 0.69604299  | 0.17310717  | 0.00000000  |
| C  | -0.92427541 | 0.44616915  | 0.00000000  |
| H  | -1.35461545 | 2.15798328  | 2.37587600  |
| H  | -1.35461545 | 2.15798328  | -2.37587600 |
| Al | 3.16325885  | -0.26133150 | 0.00000000  |
| Al | -2.03234603 | -1.19417881 | 0.00000000  |

### 5d

Free energy= -567.2631765 a.u.

|    |             |             |            |
|----|-------------|-------------|------------|
| Be | 0.88507054  | 1.65495137  | 0.00000000 |
| Be | -1.03151470 | 1.57212645  | 0.00000000 |
| Be | -0.02597413 | -1.43066842 | 0.00000000 |
| C  | 0.03766548  | 0.23520634  | 0.00000000 |
| H  | 1.31798115  | -1.99859642 | 0.00000000 |
| H  | -0.07872791 | 2.74746645  | 0.00000000 |
| Al | 1.97679864  | -0.30199739 | 0.00000000 |
| Al | -2.03645810 | -0.41690612 | 0.00000000 |

### 5e

Free energy= -567.2553243 a.u.

|    |             |             |             |
|----|-------------|-------------|-------------|
| Be | -0.14250409 | -3.19438917 | 0.00000000  |
| Be | -1.07529672 | -1.23798131 | 0.00000000  |
| Be | 0.85304826  | -1.32834682 | 0.00000000  |
| C  | -0.08353625 | 0.07851823  | 0.00000000  |
| H  | 1.46091547  | -2.57354016 | 0.00000000  |
| H  | -0.10862414 | -4.53054334 | 0.00000000  |
| Al | 0.02338217  | 1.14137859  | 1.66659500  |
| Al | 0.02338217  | 1.14137859  | -1.66659500 |

### 6a

Free energy= -567.6598771 a.u.

|    |             |             |            |
|----|-------------|-------------|------------|
| C  | -0.28148420 | 0.53889916  | 0.00000000 |
| Al | -0.63832648 | -1.65954991 | 0.00000000 |
| Be | -1.90386833 | 0.24405930  | 0.00000000 |
| Be | 0.75962013  | 1.85175793  | 0.00000000 |
| Be | -1.15215721 | 1.99040897  | 0.00000000 |
| H  | -2.56675428 | 1.55156035  | 0.00000000 |
| H  | -0.12678778 | 3.03904835  | 0.00000000 |
| Al | 1.51693423  | -0.30324183 | 0.00000000 |

|   |            |            |            |
|---|------------|------------|------------|
| H | 2.14616816 | 1.34738432 | 0.00000000 |
|---|------------|------------|------------|

## 6b

Free energy= -567.6541602 a.u.

|    |             |             |             |
|----|-------------|-------------|-------------|
| Be | 0.24253787  | 0.17323757  | -1.11944544 |
| Be | 0.24253787  | 0.17323757  | 1.11944544  |
| Be | -1.34193096 | 1.95986069  | 0.00000000  |
| C  | -0.90063884 | 0.37310499  | 0.00000000  |
| H  | 1.51883126  | -0.09487258 | 1.52565405  |
| H  | -1.67775087 | 3.23442642  | 0.00000000  |
| H  | 1.51883126  | -0.09487258 | -1.52565405 |
| Al | 3.13181161  | -0.25941416 | 0.00000000  |
| Al | -2.55709297 | -0.85663619 | 0.00000000  |

## 6c

Free energy= -567.6532896 a.u.

|    |             |             |             |
|----|-------------|-------------|-------------|
| Be | -2.37313714 | -0.33265326 | 1.31555637  |
| Be | -2.37313714 | -0.33265326 | -1.31555637 |
| Be | -0.28907034 | -1.43397281 | 0.00000000  |
| C  | -1.37060661 | -0.22179040 | 0.00000000  |
| H  | 0.97900690  | -1.92700076 | 0.00000000  |
| H  | -3.11535423 | -0.40303627 | 2.40032646  |
| H  | -3.11535423 | -0.40303627 | -2.40032646 |
| Al | -0.07872304 | 1.22326172  | 0.00000000  |
| Al | 2.66462456  | -0.26472841 | 0.00000000  |

## 6d

Free energy= -567.6528696 a.u.

|    |             |             |             |
|----|-------------|-------------|-------------|
| Be | -1.34577508 | 1.40433662  | -1.31520497 |
| Be | -1.34577508 | 1.40433662  | 1.31520497  |
| Be | 0.39752889  | 0.12203142  | 0.00000000  |
| C  | -1.16240344 | 0.43124161  | 0.00000000  |
| H  | -1.45300460 | 2.13796932  | 2.40746910  |
| H  | -1.45300460 | 2.13796932  | -2.40746910 |
| H  | 1.75627481  | -0.14879593 | 0.00000000  |
| Al | -2.44424126 | -1.16275121 | 0.00000000  |
| Al | 3.77502896  | -0.25551118 | 0.00000000  |

## 6e

Free energy= -567.6483568 a.u.

|    |             |             |            |
|----|-------------|-------------|------------|
| Be | -0.90215300 | 1.63407315  | 0.00000000 |
| Be | -0.06907200 | -1.43407085 | 0.00000000 |

|    |             |             |            |
|----|-------------|-------------|------------|
| Be | 0.99518500  | 1.56359515  | 0.00000000 |
| C  | -0.00100600 | 0.21588415  | 0.00000000 |
| H  | 0.07659301  | 2.71729715  | 0.00000000 |
| H  | 2.39558100  | 1.20204214  | 0.00000000 |
| H  | -1.42043500 | -1.94026485 | 0.00000000 |
| Al | -2.05397300 | -0.26294285 | 0.00000000 |
| Al | 1.96616200  | -0.53157785 | 0.00000000 |

### 7a

Free energy= -340.0087218 a.u.

|    |            |             |             |
|----|------------|-------------|-------------|
| C  | 0.00000000 | 0.00000000  | -0.48306586 |
| Al | 0.00000000 | 0.00000000  | 1.59750114  |
| Be | 0.00000000 | 1.58941200  | -0.02061086 |
| Be | 0.00000000 | -1.58941200 | -0.02061086 |
| Be | 0.00000000 | 0.97200800  | -1.89735086 |
| Be | 0.00000000 | -0.97200800 | -1.89735086 |
| H  | 0.00000000 | 2.36329800  | -1.26271286 |
| H  | 0.00000000 | -2.36329800 | -1.26271286 |

### 7b

Free energy= -340.0027631 a.u.

|    |             |             |            |
|----|-------------|-------------|------------|
| Be | -1.17995879 | 1.78044597  | 0.00000000 |
| Be | -1.70637226 | -0.09848833 | 0.00000000 |
| Be | 1.55141572  | 0.06099435  | 0.00000000 |
| Be | 0.78946891  | 1.83291550  | 0.00000000 |
| C  | -0.08734810 | 0.43964592  | 0.00000000 |
| H  | -0.12399748 | 2.94506484  | 0.00000000 |
| H  | 2.19981920  | 1.45208644  | 0.00000000 |
| Al | 0.04846558  | -1.64142283 | 0.00000000 |

### 7c

Free energy= -339.9942838 a.u.

|    |             |             |            |
|----|-------------|-------------|------------|
| Be | 0.90510757  | -0.90982773 | 0.00000000 |
| Be | 3.05140510  | -0.46702294 | 0.00000000 |
| Be | 1.44507308  | 0.97046201  | 0.00000000 |
| Be | -0.73278114 | 1.88408953  | 0.00000000 |
| C  | -0.09607441 | 0.40101593  | 0.00000000 |
| H  | -1.38592398 | 3.06138280  | 0.00000000 |
| H  | 4.35401455  | -0.84652433 | 0.00000000 |
| Al | -1.62052789 | -0.81013520 | 0.00000000 |

**7d**

Free energy= -339.9924432 a.u.

|    |             |             |            |
|----|-------------|-------------|------------|
| Be | 0.49992616  | -2.49086571 | 0.00000000 |
| Be | 1.91756805  | 1.34565658  | 0.00000000 |
| Be | 1.30565893  | -0.53932132 | 0.00000000 |
| Be | -0.62701114 | 2.14782060  | 0.00000000 |
| C  | 0.36304437  | 0.88810555  | 0.00000000 |
| H  | 0.42640007  | -3.84573705 | 0.00000000 |
| H  | -1.33444175 | 3.29438170  | 0.00000000 |
| Al | -1.05036865 | -0.51003373 | 0.00000000 |

**7e**

Free energy= -339.9913434 a.u.

|    |             |             |            |
|----|-------------|-------------|------------|
| Be | -1.52853220 | 1.29061957  | 0.00000000 |
| Be | 0.94074890  | 2.32531524  | 0.00000000 |
| Be | 1.26681723  | -2.15405564 | 0.00000000 |
| Be | 1.32456472  | -0.07392590 | 0.00000000 |
| C  | 0.05895477  | 0.98698490  | 0.00000000 |
| H  | 1.66555880  | -3.45241404 | 0.00000000 |
| H  | 1.58003042  | 3.51050517  | 0.00000000 |
| Al | -0.89336250 | -0.88706259 | 0.00000000 |

**8a**

Free energy= -340.5741621 a.u.

|    |             |             |             |
|----|-------------|-------------|-------------|
| C  | 0.11665320  | 0.44145958  | 0.00000000  |
| Al | -0.03300362 | -1.67549471 | 0.00000000  |
| Be | 0.03185825  | -0.06450859 | 1.59263600  |
| Be | 0.03185825  | -0.06450859 | -1.59263600 |
| Be | -0.02624185 | 1.77320721  | 0.96006200  |
| Be | -0.02624185 | 1.77320721  | -0.96006200 |
| H  | -0.08571352 | 1.27497212  | 2.32968400  |
| H  | -0.08571352 | 1.27497212  | -2.32968400 |
| H  | -0.14437629 | 2.91314049  | 0.00000000  |

**8b**

Free energy= -340.5697316 a.u.

|    |             |             |             |
|----|-------------|-------------|-------------|
| Be | 0.29552957  | 1.39868634  | 1.29812700  |
| Be | -1.38943881 | -0.06949447 | 0.00000000  |
| Be | 0.29552957  | 1.39868634  | -1.29812700 |
| Be | -3.36562880 | -0.70727841 | 0.00000000  |
| C  | 0.17406271  | 0.41688363  | 0.00000000  |
| H  | 0.41510726  | 2.17374167  | 2.36894100  |
| H  | -4.63561239 | -1.11704862 | 0.00000000  |

|    |            |             |             |
|----|------------|-------------|-------------|
| H  | 0.41510726 | 2.17374167  | -2.36894100 |
| Al | 1.49361966 | -1.06262582 | 0.00000000  |

### 8c

Free energy= -340.5664802 a.u.

|    |             |             |             |
|----|-------------|-------------|-------------|
| Be | 0.00000000  | 1.54110250  | 1.87502232  |
| Be | -1.33463391 | -0.77055125 | 1.87502232  |
| Be | -0.00000000 | 0.00000000  | -0.28619559 |
| Be | 1.33463391  | -0.77055125 | 1.87502232  |
| C  | 0.00000000  | 0.00000000  | 1.35365741  |
| H  | 0.00000000  | 2.80281469  | 2.28661324  |
| H  | -2.42730873 | -1.40140735 | 2.28661324  |
| H  | 2.42730873  | -1.40140735 | 2.28661324  |
| Al | -0.00000000 | 0.00000000  | -2.79517459 |

### 8d

Free energy= -340.5475499 a.u.

|    |             |             |            |
|----|-------------|-------------|------------|
| Be | 0.85613494  | 1.80664369  | 0.00000000 |
| Be | 1.52443193  | 0.03718497  | 0.00000000 |
| Be | -1.76695424 | 0.14988301  | 0.00000000 |
| Be | -1.08689063 | 1.90621487  | 0.00000000 |
| C  | -0.09188329 | 0.43227444  | 0.00000000 |
| H  | 1.76184169  | -1.35139771 | 0.00000000 |
| H  | 0.00538576  | 2.95808072  | 0.00000000 |
| H  | 2.24214634  | 1.33451755  | 0.00000000 |
| Al | -0.12038170 | -1.62573487 | 0.00000000 |

### 8e

Free energy= -340.5464202 a.u.

|    |             |             |             |
|----|-------------|-------------|-------------|
| Be | 1.15212100  | -0.04129200 | 0.87919700  |
| Be | -0.53842200 | 1.93051500  | 0.05484000  |
| Be | 2.97126800  | -0.50512100 | -0.16698600 |
| Be | 1.09320800  | 0.07592200  | -1.06827100 |
| C  | -0.17450700 | 0.35212600  | -0.06576200 |
| H  | 4.25696200  | -0.86286400 | -0.11101800 |
| H  | -0.84485100 | 3.21970500  | 0.14367900  |
| H  | 2.34144400  | -0.43235400 | 1.46515400  |
| Al | -1.80147800 | -0.75979500 | 0.00781800  |

### 9a

Free energy= -340.96418 a.u.

|    |             |            |            |
|----|-------------|------------|------------|
| Be | -0.92072256 | 1.84334120 | 0.00000000 |
| Be | 1.00263428  | 1.78413330 | 0.00000000 |

|    |             |             |            |
|----|-------------|-------------|------------|
| Be | -1.62521053 | 0.06294564  | 0.00000000 |
| Be | 1.57879568  | -0.05581999 | 0.00000000 |
| C  | -0.00854362 | 0.43424712  | 0.00000000 |
| H  | 1.65221500  | -1.50617639 | 0.00000000 |
| H  | 0.07301322  | 2.93252783  | 0.00000000 |
| H  | 2.35356744  | 1.20715701  | 0.00000000 |
| H  | -2.31883137 | 1.36219275  | 0.00000000 |
| Al | -0.14236078 | -1.62612189 | 0.00000000 |

## 9b

Free energy= -340.9402214 a.u.

|    |             |             |            |
|----|-------------|-------------|------------|
| Be | -2.35285539 | 0.96785703  | 0.00000000 |
| Be | -2.93930466 | -0.79540827 | 0.00000000 |
| Be | -0.06459115 | -1.28576398 | 0.00000000 |
| Be | -0.42924205 | 0.95916924  | 0.00000000 |
| C  | -1.40496480 | -0.41973281 | 0.00000000 |
| H  | -1.46204026 | 2.07405597  | 0.00000000 |
| H  | 0.95344981  | 1.13847756  | 0.00000000 |
| H  | -3.75792978 | 0.38437203  | 0.00000000 |
| H  | 1.27268105  | -1.55307149 | 0.00000000 |
| Al | 2.65904623  | 0.08393437  | 0.00000000 |

## 9c

Free energy= -340.9398834 a.u.

|    |             |             |             |
|----|-------------|-------------|-------------|
| Be | 0.00000000  | 1.14263300  | -0.30651200 |
| Be | -1.33656100 | 0.00000000  | -2.41264800 |
| Be | 0.00000000  | -1.14263300 | -0.30651200 |
| Be | 1.33656100  | 0.00000000  | -2.41264800 |
| C  | 0.00000000  | 0.00000000  | -1.44373600 |
| H  | -2.43554600 | 0.00000000  | -3.13674500 |
| H  | 2.43554600  | 0.00000000  | -3.13674500 |
| H  | 0.00000000  | -1.53505900 | 0.99919500  |
| H  | 0.00000000  | 1.53505900  | 0.99919500  |
| Al | 0.00000000  | 0.00000000  | 2.66852200  |

## 9d

Free energy= -340.9330466

|    |             |             |             |
|----|-------------|-------------|-------------|
| Be | 0.00000000  | 1.37219951  | 0.53701228  |
| Be | -0.00000000 | 0.00000000  | 3.06071026  |
| Be | -1.18835963 | -0.68609975 | 0.53701228  |
| Be | 1.18835963  | -0.68609975 | 0.53701228  |
| C  | -0.00000000 | 0.00000000  | 1.40883126  |
| H  | 0.00000000  | 0.00000000  | 4.37639826  |
| H  | 1.70509837  | -0.98443901 | -0.67356788 |
| H  | -1.70509837 | -0.98443901 | -0.67356788 |
| H  | -0.00000000 | 1.96887801  | -0.67356788 |

|    |            |            |             |
|----|------------|------------|-------------|
| Al | 0.00000000 | 0.00000000 | -2.26889774 |
|----|------------|------------|-------------|

9e

Free energy=-340.9287044

|    |             |             |            |
|----|-------------|-------------|------------|
| Be | 2.72149735  | -0.88771659 | 0.00000000 |
| Be | 2.23439241  | 0.90844602  | 0.00000000 |
| Be | -0.19650143 | -1.20906871 | 0.00000000 |
| Be | 0.30910028  | 1.01390241  | 0.00000000 |
| C  | 1.20372021  | -0.42743555 | 0.00000000 |
| H  | -1.05739511 | 1.40847813  | 0.00000000 |
| H  | 3.60483866  | 0.24369655  | 0.00000000 |
| H  | -3.56206244 | 0.58013940  | 0.00000000 |
| H  | 1.40288595  | 2.06160412  | 0.00000000 |
| Al | -2.14496483 | -0.07935057 | 0.00000000 |
